# Supplementary material for: Facile, single-step process for the preparation of controlled release formulations of ibuprofen in a hydrophilic matrix using supercritical CO 2
Source: Royal Society of Chemistry journal article supplement (doi:10.1039/d5nj03243a), 2025-12-29

## Supplementary information

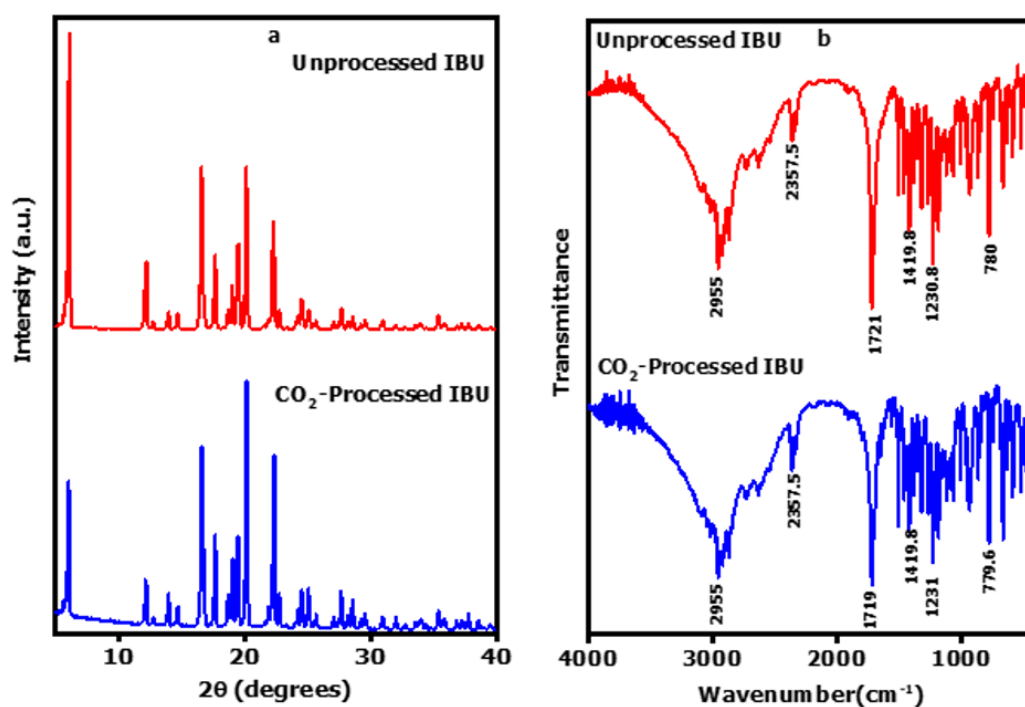

Fig S1. (a) XRD pattern of IBU before and after scCO<sub>2</sub> processing; (b) FT-IR spectrum of IBU before and after scCO<sub>2</sub> processing.

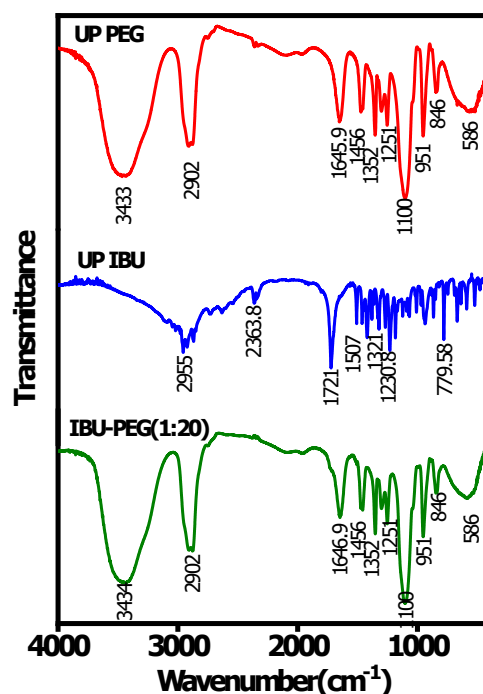

Fig S2. FT-IR spectrum of unprocessed IBU, unprocessed PEG, and scCO<sub>2</sub>-processed IBU-PEG.

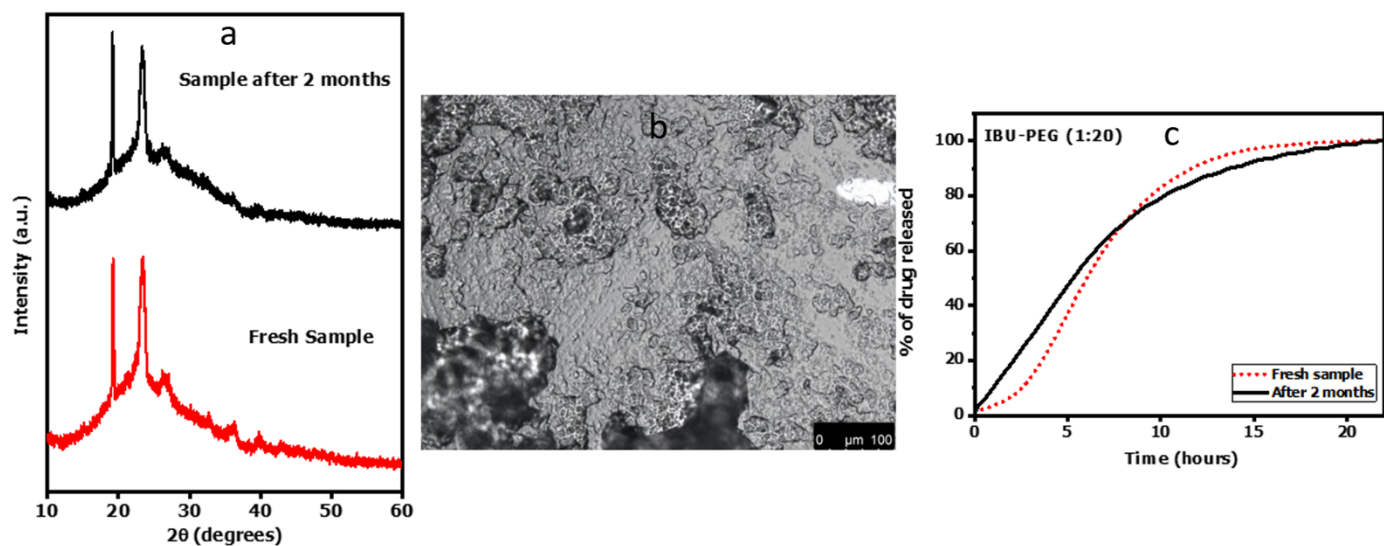

Fig S3. (a) XRD pattern of IBPEGCO<sub>2</sub> just after scCO<sub>2</sub>-processing and after two months of storage; (b) optical microscopic image of IBPEGCO<sub>2</sub> after two months; and (c) drug-release curves of IBPEGCO<sub>2</sub> after two months with the reference curve of a fresh sample.

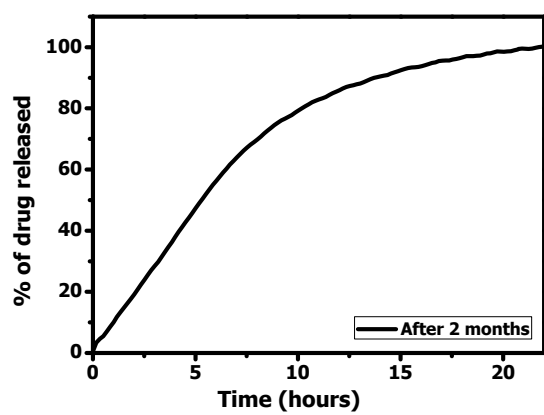

Supplement: d5nj03243a1.pdf [file d5nj03243a1.pdf]
